# Supplementary material
Source: PubMed Central journal article supplement (PMC7038297)
Supplement: AAC.01868-19-s0001.pdf [file AAC.01868-19-s0001.pdf]

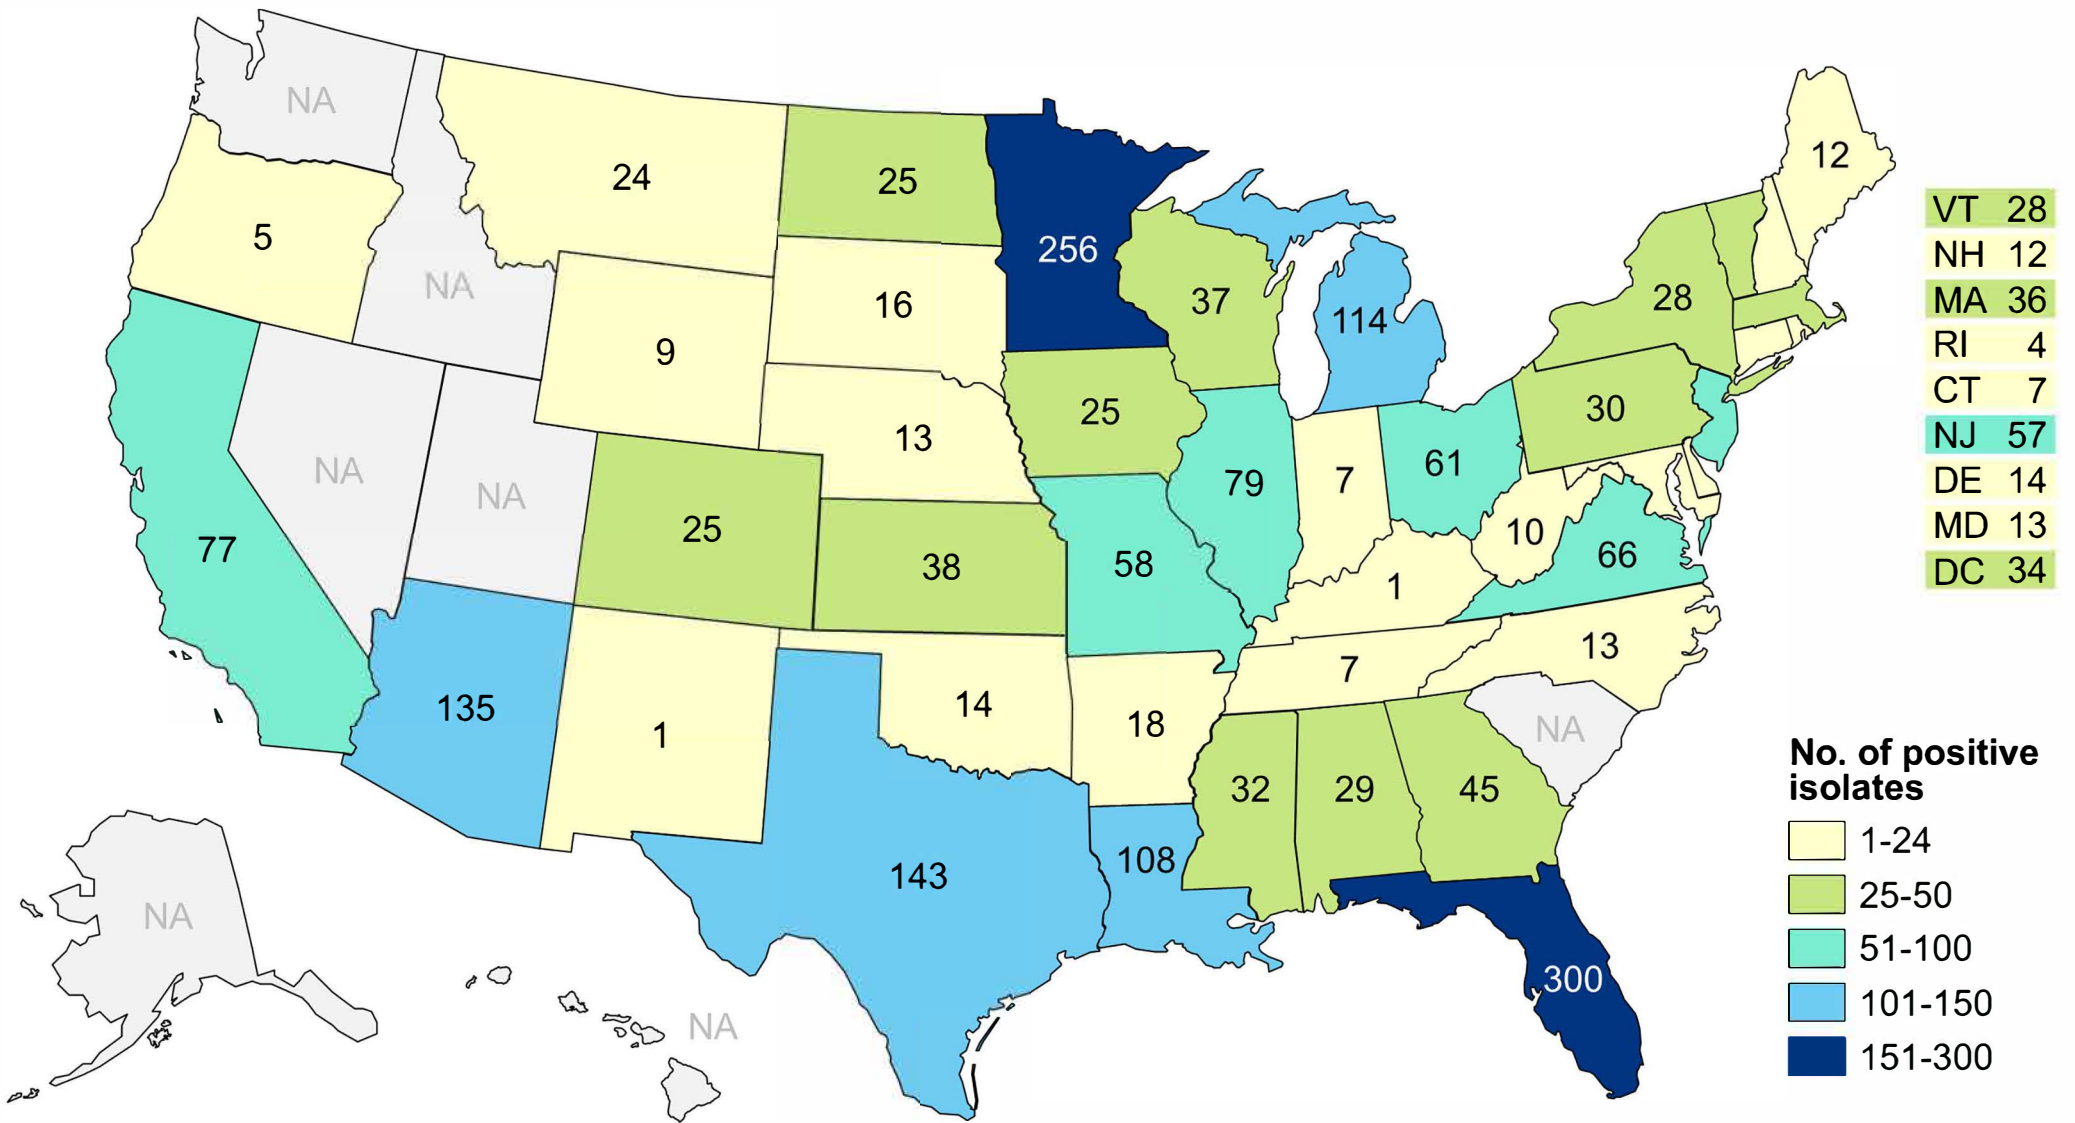

Figure S1: Distribution of state of specimen origin for total number of *Nocardia* isolates in the study

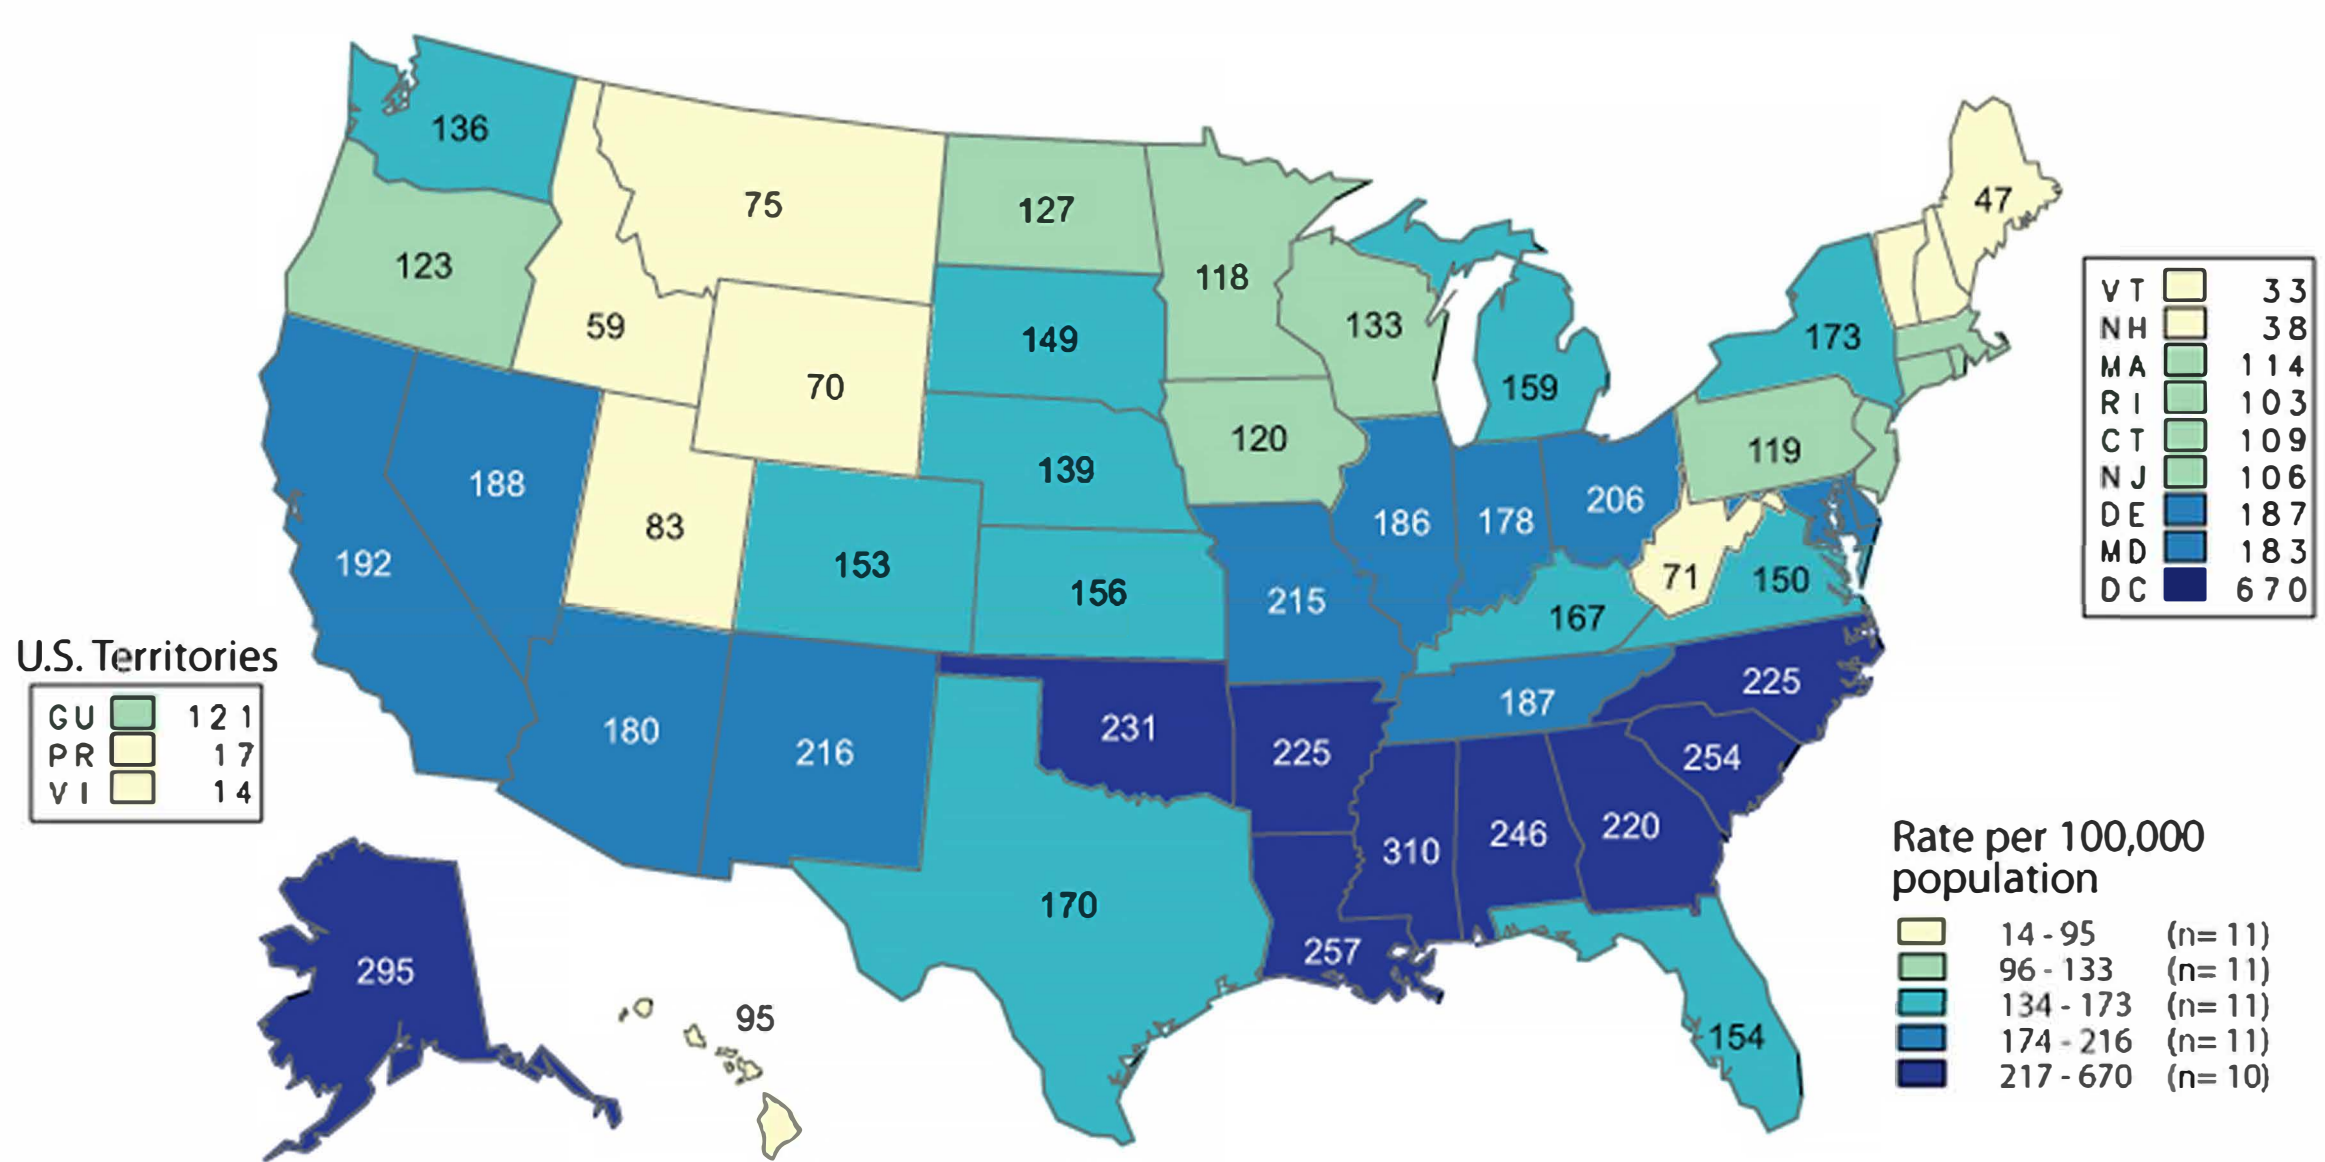

Figure S2: Distribution of state of specimen origin of *Nocardia* isolates in the study (rate per 100,000 population)
